# Supplementary material for: An integrative genomic analysis of the Longshanks selection experiment for longer limbs in mice
Source: eLife journal article supplement (doi:10.7554/elife.42014), 2019-06-06
Supplement: supp [file elife-42014-supp-v1.zip]

Archive with 19 entries (19 files):
- elife_poa_e42014_Transparent_Reporting_File.pdf
- elife_poa_e42014_Supplementary_File_2.xlsx
- elife_poa_e42014_Supplementary_File_5.xlsx
- elife_poa_e42014_Supplementary_File_6.xlsx
- elife_poa_e42014_Supplementary_File_4.xlsx
- elife_poa_e42014_Figure_5_figure_supplement_1.png
- elife_poa_e42014_Figure_1_figure_supplement_2.png
- elife_poa_e42014_Supplementary_File_8.xlsx
- elife_poa_e42014_Figure_2_figure_supplement_3.png
- elife_poa_e42014_Figure_2_figure_supplement_1.png
- elife_poa_e42014_Figure_3_figure_supplement_1.png
- elife_poa_e42014_Figure_2_figure_supplement_2.png
- elife_poa_e42014_Figure_1_figure_supplement_1.png
- elife_poa_e42014_Figure_3_figure_supplement_2.png
- elife_poa_e42014_Supplementary_File_1.xlsx
- elife_poa_e42014_Supplementary_File_3.xlsx
- elife_poa_e42014_Figure_4_figure_supplement_1.png
- elife_poa_e42014_Figure_4_figure_supplement_2.png
- elife_poa_e42014_Supplementary_File_7.xlsx
