# Supplementary material for: An integrative genomic analysis of the Longshanks selection experiment for longer limbs in mice
Source: eLife journal article supplement (doi:10.7554/elife.42014), 2019-06-06
Supplement: supp [file elife-42014-supp-v1.zip › elife_poa_e42014_Supplementary_File_1.xlsx]

## Sheet: Sheet1
Pool	n	Total reads	Mapped Sequence (Gbp)	Fold-coverage (x)	Median cov./Sample (x)
Ctrl, F0	25	1856046931	251.3	92	2.42
LS1, F0	26	1858953260	256.1	93.8	2.82
LS2, F0	25	2011646609	283.2	103.7	3.57
Ctrl, F17	32	1882838451	260.2	95.3	2.97
LS1, F17	32	2071122164	292.1	107	2.95
LS2, F17	31	1897174855	267	97.8	2.93
Total sum	169	11577782270	1609.9	589.5	2.91
Supplementary File 1. Sequencing Summary. For each line and generation, we individually barcoded all available individuals and pooled for sequencing. We aimed for a sequencing depth of around 100x coverage for 50–64 haplotypes per sample. Since the CD-1 mice were founded by an original import of 7 inbred females and 2 inbred males, we expect a maximum of 18 segregating haplotypes at any given loc…
