# Supplementary material for: An integrative genomic analysis of the Longshanks selection experiment for longer limbs in mice
Source: eLife journal article supplement (doi:10.7554/elife.42014), 2019-06-06
Supplement: supp [file elife-42014-supp-v1.zip › elife_poa_e42014_Supplementary_File_2.xlsx]

## Sheet: Sheet1
S \ FST	Ctrl F0	LS1 F0	LS2 F0	Ctrl F17	LS1 F17	LS2 F17
Ctrl F0	6642764	0.00095	0.00176	0.06067	0.09601	0.10694
LS1 F0	7213186	6612653	0.001	0.07731	0.08045	0.1083
LS2 F0	7306904	7282910	6772383	0.07535	0.09505	0.09634
Ctrl F17	7101376	7118072	7227135	5847708	0.17469	0.17942
LS1 F17	7121979	7062183	7214508	6795919	5813162	0.17631
LS2 F17	7218921	7155580	7239774	6832125	6778518	5749742
Supplementary File 2. Pairwise FST and segregating sites (S) between populations. As expected, there is a general trend of decrease in diversity after 17 generations of breeding. Globally, there was a 13% decrease in diversity, but F17 populations still retained on average ~5.8M segregating SNPs (diagonal). There was very little population differentiation, as indicated by low FST among the three …
