# Supplementary material for: An integrative genomic analysis of the Longshanks selection experiment for longer limbs in mice
Source: eLife journal article supplement (doi:10.7554/elife.42014), 2019-06-06
Supplement: supp [file elife-42014-supp-v1.zip › elife_poa_e42014_Supplementary_File_3.xlsx]

## Sheet: Sheet1
Rk	Chr	Span (Mbp)	Peak	Genes	Core span	TAD span	Genes	s	Type	Candidate genes*	All genes
1	5	38.95–45.13	41.77	14	41.77–41.78	41.05–41.81	3	0.26	Parallel	Nkx3-2	Bod1l, Bst1, C1qtnf7, Cc2d2a, Cd38, Cpeb2, Fbxl5, Fgfbp1, Hs3st1, Ldb2, Nkx3-2†, Prom1, Rab28, Tapt1
2	10	77.47–87.69	81.07	190	78.30–85.09	77.98–86.58	175	0.21	Parallel	Sbno5, Aes, Adamtsl5*, Chst11*, Cry1, Prdm4*	Abca7, Adamtsl5*, Adat3, Aes*†, Agpat3, Aire, Aldh1l2, Amh, Ankrd24, Ap3d1, Apba3, Apc2, Appl2, Arid3a, Ascl1, Ascl4, Atcay, Atp5d, Atp8b3, Bpil2, Bsg, Btbd11, Btbd2, C2cd4c, Casp14, Ccdc105, Cdc34, Celf5, Cfd, Chst11*†, Cirbp, Ckap4, Cnn2, Creb3l3, Cry1†, Csnk1g2, Cstb, D10Jhu81e, D10Wsu102e, D10Wsu52e, Dapk3, Dazap1, Diras1, Dnmt3l, Dohh, Dos, Dot1l, Eef2, Efna2, Eid3, Elane, Fam108a, Fbxo7, Fg…
3	18	53.63–63.50	58.18	53	58.18–58.19	57.96–59.08	4	0.18	LS2-specific	-	Ablim3, Adamts19, Adrb2, Afap1l1, Aldh7a1, Apcdd1, Arhgef37, Arsi, Camk2a, Cd74, Cdx1, Cep120, Chsy3, Csf1r*†, Csnk1a1, Csnk1g3, Ctxn3, Dctn4, Fam38b, Fbn2, Fbxo38, Gramd3, Grpel2, Hmgxb3, Htr4, Iigp1, Il17b, Isoc1, Lmnb1, March3, Megf10, Myoz3, Napg, Ndst1, Pcyox1l, Pde6a, Pdgfrb, Phax, Ppargc1b, Prrc1, Rbm22, Rps14, Sh3tc2, Slc12a2, Slc26a2*†, Slc27a6, Slc6a7, Spink10, Spink13, Spink7, Synpo, T…
4	13	35.59–55.21	48.65	112	48.65–48.66	47.06–49.74	22	0.18	LS2-specific	Id4*†	Arl10, Aspn, Atxn1, Auh, Barx1, Bicd2, Bmp6, C78339, Cage1, Cap2, Ccdc90a, Cd83, Cdhr2, Cdyl, Cenpp, Cks2, Cltb, Cplx2, Dek, Diras2, Drd1a, Dsp, Dtnbp1, Ecm2, Edn1†, Eef1e1, Eif4e1b, Elovl2, F13a1, Faf2, Fam120a, Fars2, Fbxw17, Fgd3, Fgfr4, Gadd45g, Gcm2, Gcnt2, Gfod1, Gmpr, Gprin1, Higd2a, Hivep1, Hk3, Hrh2, Iars, Id4*†, Ippk, Jarid2, Kdm1b, Kif13a, Ly86, Lyrm4, Mak, Msx2*†, Muted, Mylip, Nedd9,…
5	1	53.16–57.13	55.27	21	58.27–58.28	57.96–59.08	4	0.14	LS1-specific	-	Ankrd44,Asnsd1,Boll,Ccdc150,Coq10b,Gtf3c3,Hecw2,Hsfy2,Hspd1,Hspe1,Mars2,Mobkl3,Ormdl1,Osgepl1,Pgap1,Plcl1,Pms1,Rftn2,Satb2*,Sf3b1,Stk17b
6	15	31.92–44.43	41.54	57	41.54–42.55	41.13–42.93	3	0.14	LS2-specific	Rspo2*†	Abra, Angpt1, Ankrd46, Atp6v1c1, Azin1, Baalc, Cox6c, Cthrc1, Dcaf13, Dpys, Eif3e, Eny2, Fbxo43, Fzd6, Grhl2, Hrsp12, Kcns2, Klf10, Laptm4b, Lrp12, Matn2, Mtdh, Ncald, Nipal2, Nudcd1, Odf1, Osr2, Oxr1, Pabpc1, Pgcp, Polr2k, Pop1, Rgs22, Rims2, Rnf19a, Rpl30, Rrm2b, Rspo2*†, Sdc2, Sema5a, Slc25a32, Snord123, Snx31, Spag1, Stk3, Tas2r119, Tm7sf4, Tmem74, Tnrc18, Trhr, Tspyl5, Ttc35, Ubr5, Vps13b, Y…
7	6	118.65–125.25	120.3	108	120.30–120.31	119.45–120.49	12	0.13	LS2-specific	Wnt5b*	A2m, Acrbp, Adipor2, Aicda, Apobec1, Atn1*, Atp6v1e1, B4galnt3, Bcl2l13, Bid, C1ra, C1rb, C1rl*, C1s, C3ar1, Cacna1c, Cacna2d4, Ccdc77, Cd163, Cd27, Cd4, Cdca3, Cecr2, Cecr5, Cecr6, Chd4, Clec4a1, Clec4a2†, Clec4a3, Clec4a4, Clec4b1, Clec4b2, Clec4d, Clec4e, Clec4n, Clstn3, Cops7a, Dcp1b, Dppa3, Emg1, Eno2, Erc1, Fbxl14, Foxj2, Gapdh, Gdf3, Gnb3, Gpr162, Grcc10, Iffo1, Il17ra, Ing4, Iqsec3, Kdm5a…
8	11	111.10–115.06	113.42	16	113.42–113.43	111.54–113.62	2	0.12	LS2-specific	Sox9*	Btbd17, Cdc42ep4, Cog1, Cpsf4l, D11Wsu47e, D11Wsu99e, Dnaic2, Gpr142, Gprc5c, Kif19a, Rpl38*†, Sdk2, Slc39a11, Sox9*†, Sstr2, Ttyh2
Rk: ranking by s
Chr: Chromosome
Mbp: megabase pairs
s: selection coefficient
*	Genes with short limb, short tibia or abnormal tibia knockout phenotypes
†	Genes with cartilage or osteoblast morphology knockout phenotypes
Gene	Genes within the TAD span
Supplementary File 3. Full details on the eight discrete loci. Listed here are the eight loci shown in Table 1, with additional details on the core span and the TAD span used to identify candidate genes, and a full list of genes within the full span.
