# Supplementary material for: An integrative genomic analysis of the Longshanks selection experiment for longer limbs in mice
Source: eLife journal article supplement (doi:10.7554/elife.42014), 2019-06-06
Supplement: supp [file elife-42014-supp-v1.zip › elife_poa_e42014_Supplementary_File_4.xlsx]

## Sheet: Sheet1
				SNP Freq. change		Amino acid change
Gene symbol	Chrom	dbSNP ID	SNP position	LS1	LS2	LS1	Dir.	PhastCons	KO phenotype (limbs/digits/ tail)	KO lethal?	KO overall assessment
Traf3ip1	1	rs47229691	91500846	0.28	0.53	M143T	PUR	0.014	polydactyly, curly tail	Y	abnormal nervous system development, abnormal neural tube morphology, absent embryonic cilia, cardiac edema, embryonic lethality (complete penetrance), microphthalmia
		rs48526274	91505448	0.12	0.55	R313K	PUR	0.706
		rs37605154	58063554	0.04	0.61	Q1426R	PUR	0.997
		rs250429553	58209792	0.02	0.78	R5Q	DIV	1
Cutal	2	rs226367576	34882365	0.36	0.51	I47S	PUR	0.996	polydactyly	N	None
Galnt3	2	rs27987860	66084173	0.36	0	E633D	PUR	1	abnormal femur morphology	N	Mice homozygous for a knock-out allele exhibit decreased circulating alkaline phosphatase, hypercalcemia, hyperphosphatemia, decreased circulating parathyroid hormone, and male specific postnatal growth retardation, infertility, and increase in bone density.
Col27a1	4	rs33038048	63225145	0.2	0.52	T357A	PUR	0.001	short limbs		Mice homozygous for an in-frame deletion display neonatal lethality, respiratory failure, and severe chondrodysplasia.
		rs32148105	63225427	0.3	0.64	N451D	DIV	0
		rs32529591	63225479	0.3	0.6	P468L	DIV	0.001		Y
		rs27905388	63272545	0.23	0.57	V816I	DIV	0.137
		rs257793193	63306703	0.25	0.68	E1176D	DIV	1
		rs31967053	63317333	0.29	0.63	D1316E	PUR	1
Fuz	7	rs46684086	44898988	0.38	-0.42	L264M	DIV	0.637	abnormal apical ectodermal ridge morphology, polydactyly	Y	Mice homozygous for a gene trapped allele exhibit neural tube closure defects, abnormal craniofacial morphology, abnormal skeletal morphology, polydactyly, anopthalmia, pulmonary hypoplasia, and cardiac outflow tract defects.
		rs253122287	44900158	0.38	-0.42	D353E	PUR	0.669
		rs243865195	44900281	0.38	-0.42	Q394H	DIV	0.987
		rs31477222	44900404	0.38	-0.42	H385R	DIV	1
Acan	7	rs262365125	79096707	0.4	-0.11	S698R	DIV	0.002	abnormal limb morphology, brachydactyly, brachypodia, short humerus, short femur, abnormal limb development, short limbs, absent caudal vertebrae	Y	Spontaneous mutations in this gene lead to dwarfism, cartilage, skeletal and limb anomalies, craniofacial defects, hearing loss and neonatal death due to respiratory failure. Homozygotes for an ENU-induced allele show cardiomyopathy as well as cleft palate, disproportionate dwarfism and brachypodia.
		rs32400885	79099204	0.41	0.09	V1241A	PUR	0.402
		rs31327907	79099207	0.41	0.09	N1242S	PUR	0.931
		rs32439390	79099513	0.45	-0.13	S1344I	DIV	0.023
		rs32085027	79100023	0.35	-0.02	E1514G	PUR	1
		rs49012578	79100506	0.36	0.05	N1675I	PUR	0.361
		rs48571987	79100667	0.35	0.1	I1729V	PUR	0
		rs36376581	79101084	0.4	-0.09	Y1868H	DIV	0.306
Kif7	7	rs211772880	79699167	0.46	0.04	N1220T	DIV	0.002	abnormal limb bud morphology, polydactyly, postaxial polydactyly, preaxial polydactyly, syndactyly	Y	Mice homozygous for a knock-out allele exhibit neonatal lethality, exencephaly, polydactyly, abnormal sternum, edema, abnormal ribs, and abnormal neurogenesis. Mice homozygous for an ENU-induced allele exhibit prenatal lethality, polydactyly, and abnormal neural tube development and neurogenesis.
		rs31859391	79699507	0.42	0.06	W1137R	PUR	0.992
		rs222106773	79708493	0.58	0.01	S570G	PUR	0.152
Dot1l	10	rs51353227	80783290	0.78	0.89	V371A	PUR	0.075	short tail	Y	Mice homozygous for a gene trap allele show late embryonic lethality. Mice homozygous for a null allele die by E10.5 displaying a growth arrest, abnormal yolk sac angiogenesis and heart dilation while mutant ES cells show elevated apoptosis, G2 cell cycle arrest, telomere elongation and aneuploidy.
		rs234091350	80786131	0.78	0.89	L756P	PUR	0.198
		rs46367861	80789444	0.63	0.69	P1175L	DIV	0.367
Cap2	13	rs220246885	46530979	0.22	0.47	V42M	DIV	1	oligodactyly	Y	Mice homozygous for a knock-out allele are smaller, prone to eye infections and show microphthalmia, cardiac conduction defects and dilated cardiomyopathy, predominantly in males. Males are underrepresented at weaning and ~70% die suddenly by 12 weeks of age, whereas females survive at nearly expected levels.
Syk	13	rs6363905	52640675	-0.01	0.51	C482S	PUR	0.986	abnormal foot pad morphology, decreased bone resorption	Y	Homozygous null mice have high rates of postnatal lethality, exhibit developmental defects of B cells, T cells and osteoclasts, and have defective dendritic cell cross-presentation of antigens from necrotic cells.
Myo10	15	rs13482486	25732087	-0.17	0.42	S350P	PUR	0.688	abnormal tail pigmentation, decreased tail pigmentation, abnormal digit morphology, fused phalanges, syndactyly	N	Mice homozygous for a spontaneous null allele display decreased body size, white spotting, decreased tail pigmentation, and syndactyly as well as various eye defects including iris coloboma, corneal opacity, and persistence of hyaloid vascular system.
Fbn2	18	rs13464230	58023239	0.1	0.48	K2503E	PUR	0.769	abnormal interdigital cell death, abnormal autopod morphology, fused phalanges, syndactyly	N	Homozygotes for spontaneous, chemically-induced, and targeted null mutations show bilateral syndactyly with fusion of both soft and hard tissues. Deafness found in an X-ray induced allelic mutant is apparently due to the joint disruption of a linked gene.
Chrom: Chromosome
KO: knock-out
Dir.: directionality
PUR: purifying
DIV: diversifying
Supplementary File 4. Detected protein-coding changes with large allele frequency shift in amino acids. Listed are genes carrying large frequency changing SNPs affecting amino acid residues. Highlighted cells indicate the line with greater frequency changes ≥ 0.34 (red text with shading). Other suggestive changes are also shown with red numbers in unshaded cells. The changed amino acids are marke…
