# Supplementary material for: An integrative genomic analysis of the Longshanks selection experiment for longer limbs in mice
Source: eLife journal article supplement (doi:10.7554/elife.42014), 2019-06-06
Supplement: supp [file elife-42014-supp-v1.zip › elife_poa_e42014_Supplementary_File_5.xlsx]

## Sheet: Sheet1
Gene	Chr	Start	End	Size	Type	Primer (5' - 3')
Rab28	5	41698405	41625451	785	For	AGGTGGCAAGATGTTGGATAAATAC
					Rev	GATCATCAAAGCTTGGAGCAGC
Nkx3-2	5	41763877	41762039	579	For	GCGATCCTCAACAAGAAAGAGGA
					Rev	GCGCTTCTTTCGCGGTTTAG
Bod1l	5	41832764	41828797	873	For	GATGCCATGTCAATCTTGGAAACC
					Rev	CACTGTGAGTTCGTCATCAGAATC
Chr: Chromosome
For: forward
Rev: reverse
Supplementary File 5. Oligonucleotides for in situ hybridization probes.
