# Supplementary material for: An integrative genomic analysis of the Longshanks selection experiment for longer limbs in mice
Source: eLife journal article supplement (doi:10.7554/elife.42014), 2019-06-06
Supplement: supp [file elife-42014-supp-v1.zip › elife_poa_e42014_Supplementary_File_6.xlsx]

## Sheet: Sheet1
VP	Chr	Start	End	Type	Primer (5' - 3')
N1	5	41165684	41165705	Biotin	/5Biosg/GAGTTATCTCTATGGGAGAAGT
	5	41165733	41165752	Nested	CTTGAGTTTGCCACCCAAAC
N2-DS	5	41403983	41404002	Biotin	/5Biosg/TGGCGATCTGAAGAACTAAG
	5	41403985	41404010	Nested	GCGATCTGAAGAACTAAGAAGCTTAG
N3	5	41535787	41535806	Biotin	/5Biosg/GTGGTTGTAAGTAGCAGACA
	5	41535790	41535813	Nested	GTTGTAAGTAGCAGACACAGAGAT
VP: Viewpoint
Chr: Chromosome
Supplementary File 6. Oligonucleotide primers for multiplexed 4C-seq of enhancer viewpoints at the Nkx3-2 locus. The 4C-seq adapter and adapter-specific primer sequences are given in (98). N2-DS denotes its location as 18 kbp downstream of the actual N2 enhancer. All viewpoints are pointed towards Nkx3-2 gene body (“+” strand).
