# Supplementary material for: An integrative genomic analysis of the Longshanks selection experiment for longer limbs in mice
Source: eLife journal article supplement (doi:10.7554/elife.42014), 2019-06-06
Supplement: supp [file elife-42014-supp-v1.zip › elife_poa_e42014_Supplementary_File_7.xlsx]

## Sheet: Sheet1
Enh	Chr	Start	End	Size	Type	Primer (5' - 3')
N1	5	41165777	41166605	829	For	TCAGCTGATATCTTCAGCTGTCGACGCTGAACATTAAAGCCATTACAGGAGCTTTCC
					Rev	TCAGCTGATATCTTCAGCTCTCGAGCTGCCAACAGGCTCCTTCCTATAAACC
N3	5	41536216	41537263	1048	For	TCAGCTGATATCTTCAGCTGTCGACCACGAGACTTAGCCAAACCTGAGGTG
					Rev	TCAGCTGATATCTTCAGCTCTCGAGCTTCCTCCCAGTGCATATCTCCCAAC
Enh: Enhancer
Chr: chromosome
For: forward
Rev: reverse
Supplementary File 7. Oligonucleotide primers for amplifying the enhancers at the Nkx3-2 locus. Each of the amplicons are tagged with SalI (forward) or XhoI (reverse) sites (underlined) for concatenation and flanked by EcoRV sites (underlined and bold) for insertion into the pBeta-lacZ-attBx2 reporter vector upstream of the β-globin minimal promoter.
