# Supplementary material for: An integrative genomic analysis of the Longshanks selection experiment for longer limbs in mice
Source: eLife journal article supplement (doi:10.7554/elife.42014), 2019-06-06
Supplement: supp [file elife-42014-supp-v1.zip › elife_poa_e42014_Supplementary_File_8.xlsx]

## Sheet: Sheet1
Allele	Chr	Start	End	Size	Type	Primer (5' - 3')
N3-F0 Major	5	41536402	41536520	119	For	GCAAATCTTGAAAAGTCAGGGAATAAAATA
					Rev	GCTAAATTTTGCCTCCTGCTTTT
N3-F17 Selected	5	41536402	41536520	119	For	GCAAATCTTGAAAAGTCAGGGAATAAAATG
					Rev	GCTAAATTTTGCCTCCTGCTTTG
Chr: Chromosome
For: forward
Rev: reverse
Supplementary File 8. Oligonucleotide primers for allele-specific genotyping of the N3 enhancer. The primers were designed to target two SNPs (bold) in the N3 enhancer, rs33219710 and rs33600994.
