# Supplementary figures and images for: An integrative genomic analysis of the Longshanks selection experiment for longer limbs in mice
Source: eLife journal article supplement (doi:10.7554/elife.42014), 2019-06-06

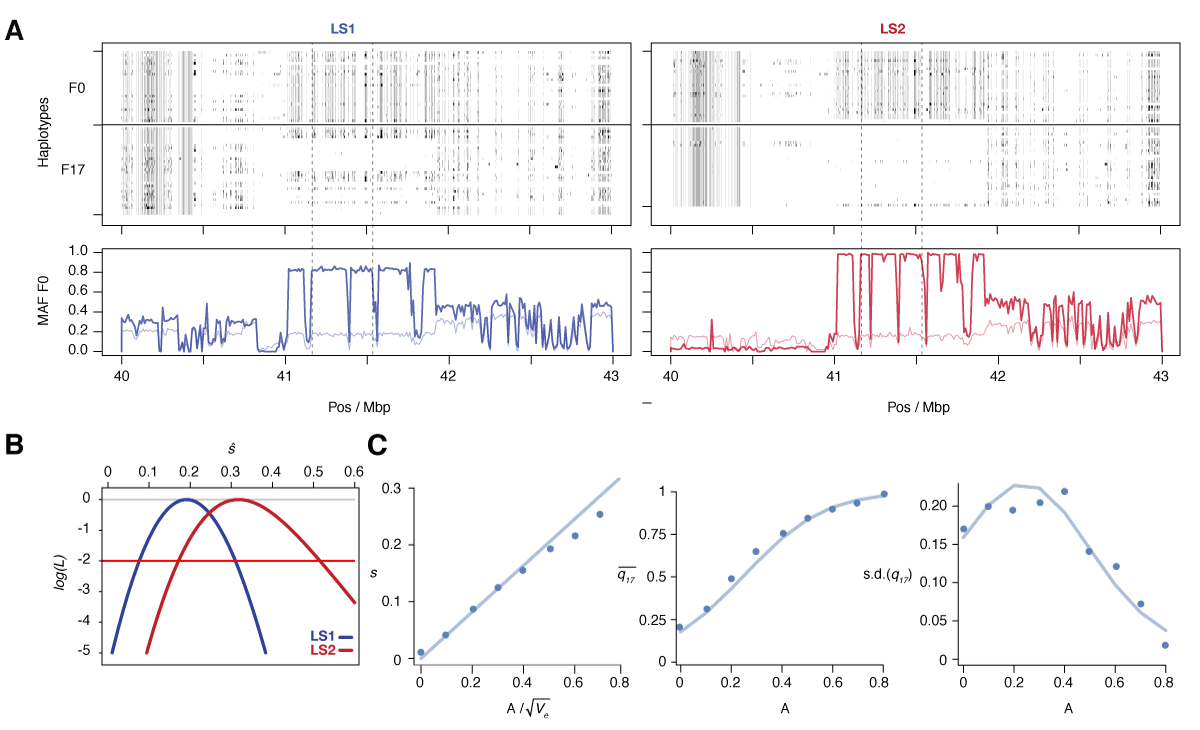

Supplement: supp [file elife-42014-supp-v1.zip › elife_poa_e42014_Figure_5_figure_supplement_1.png]

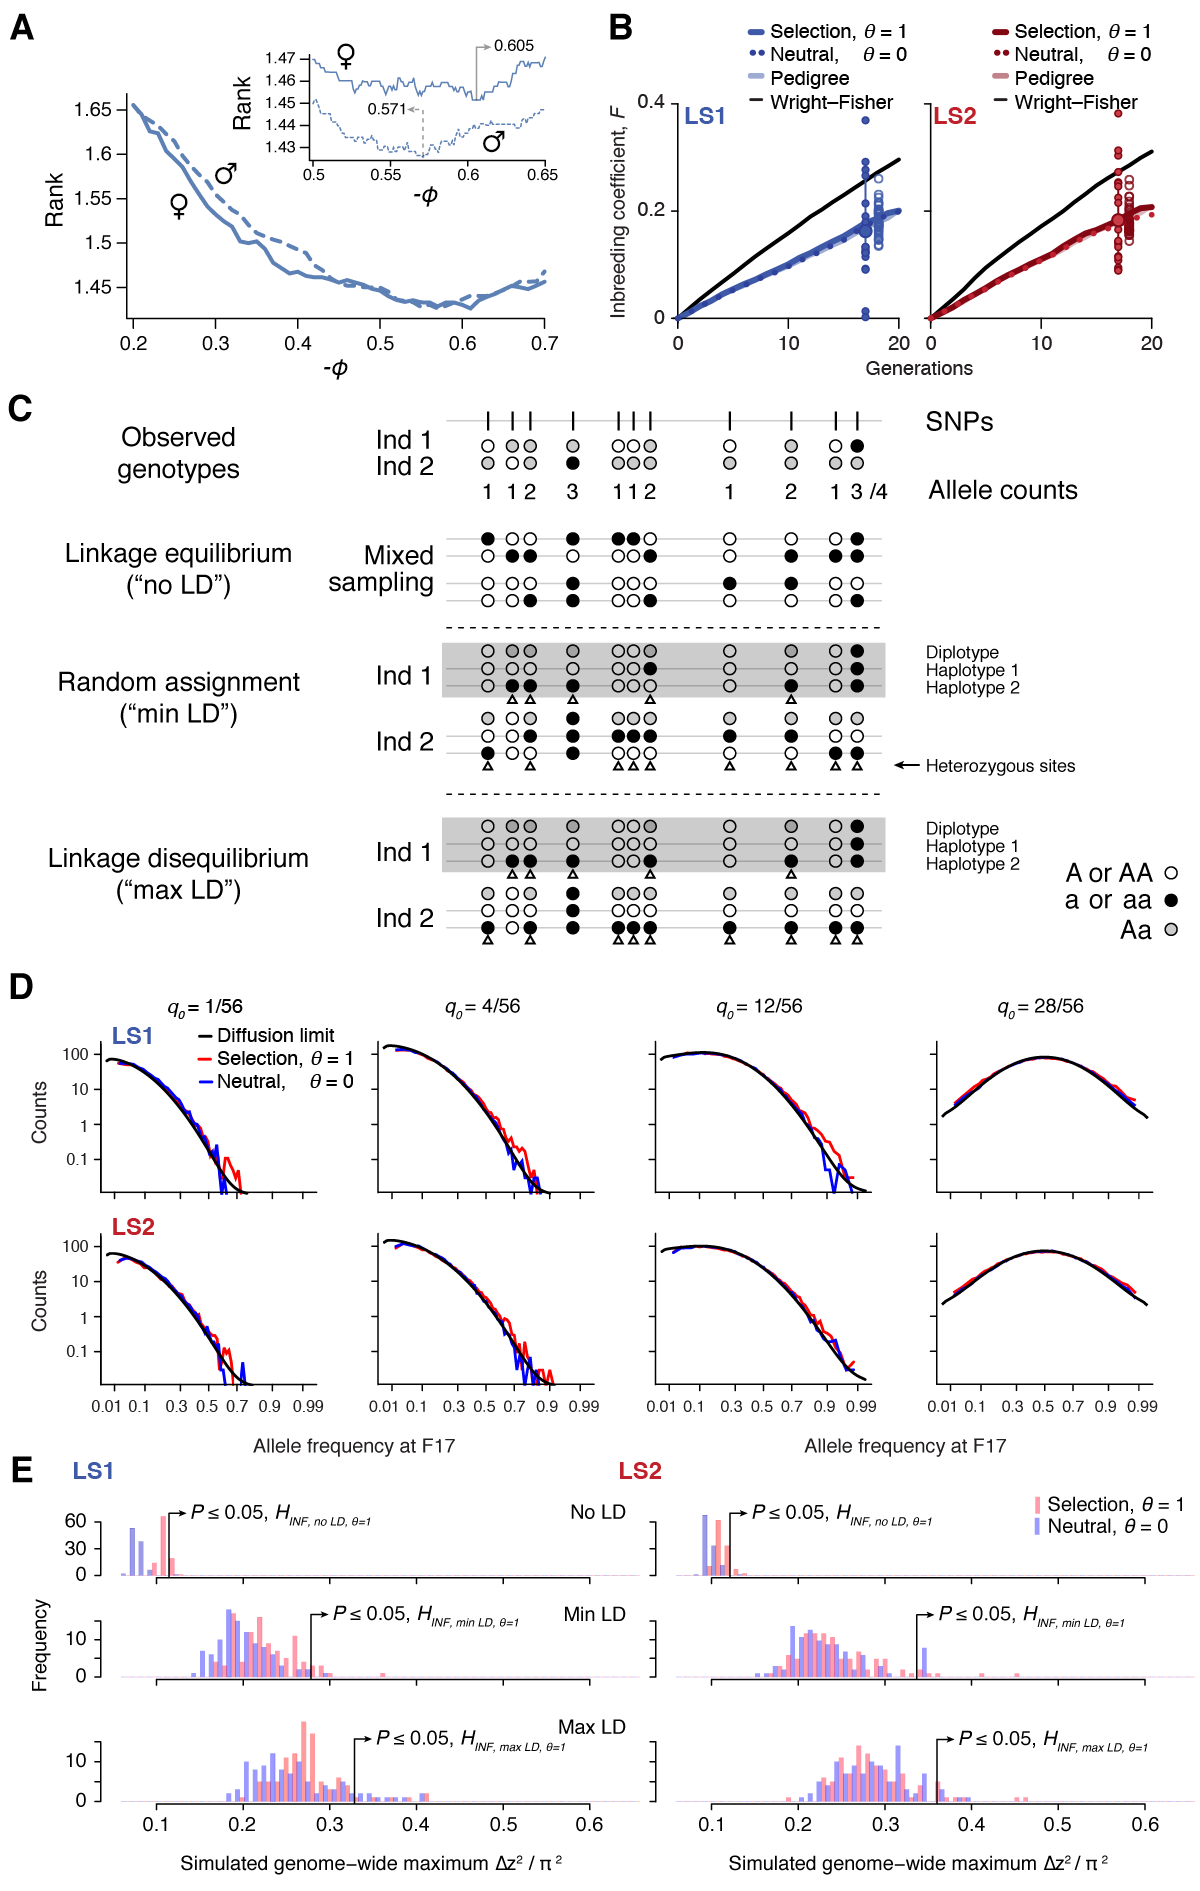

Supplement: supp [file elife-42014-supp-v1.zip › elife_poa_e42014_Figure_1_figure_supplement_2.png]

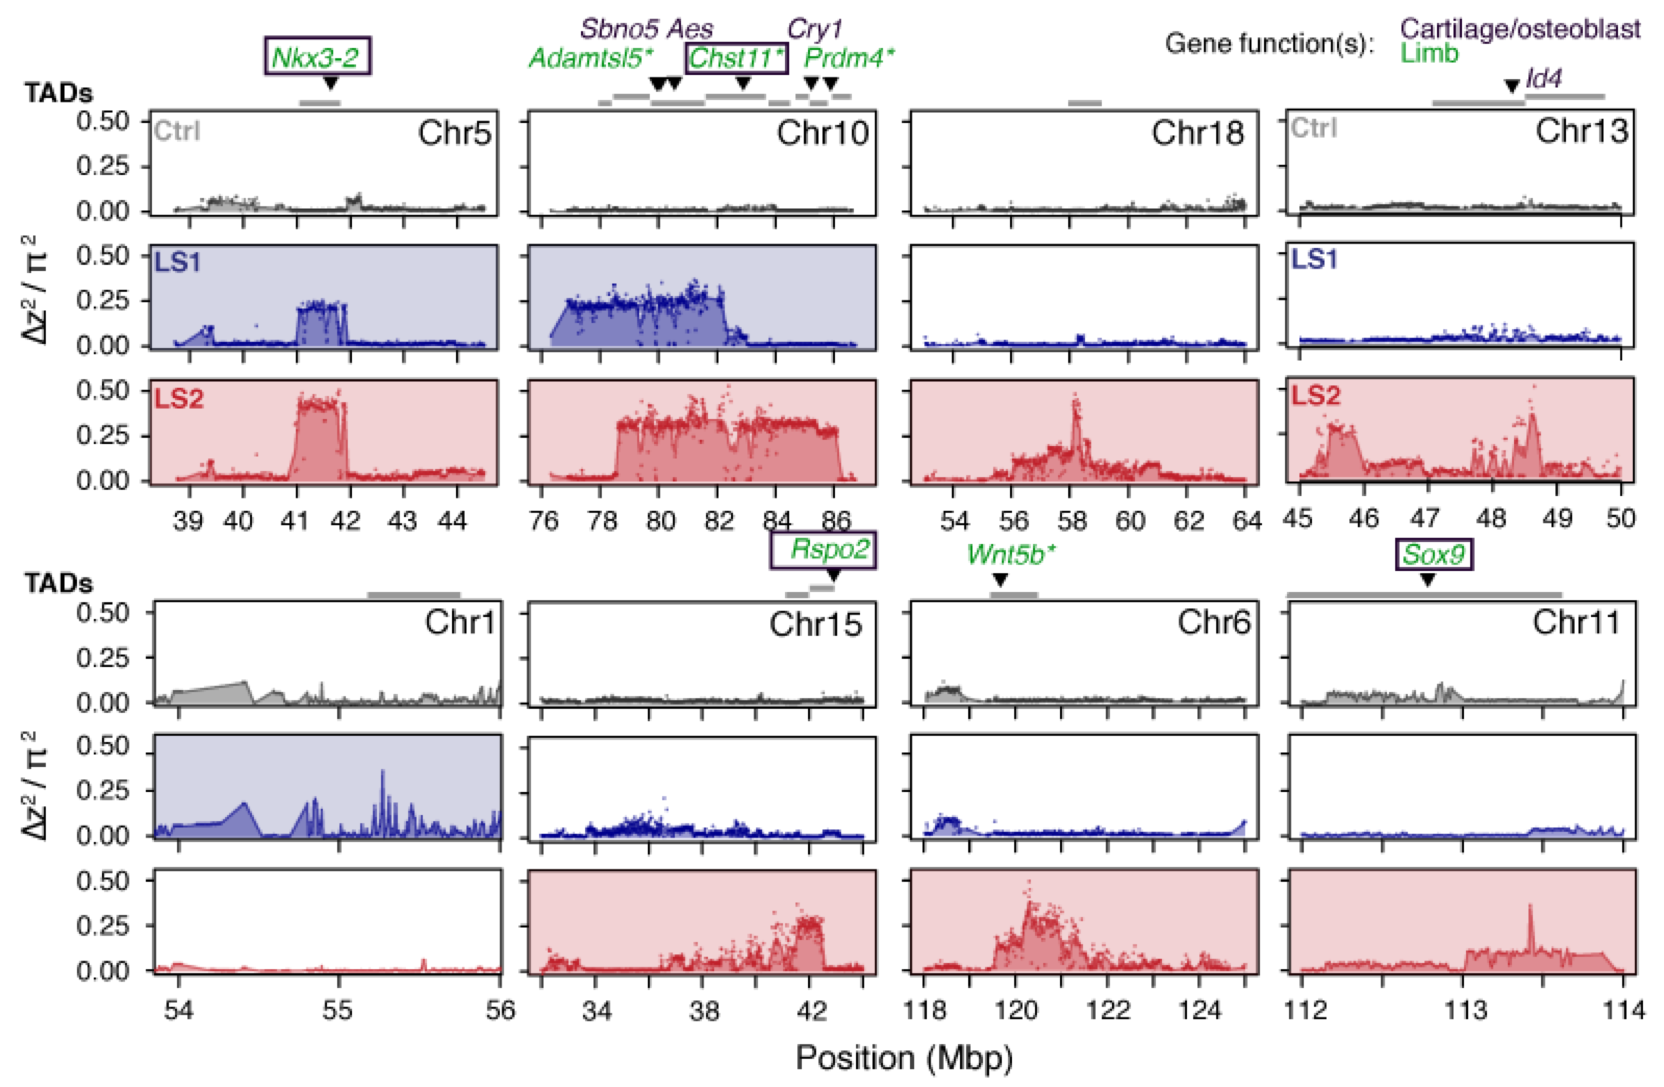

Supplement: supp [file elife-42014-supp-v1.zip › elife_poa_e42014_Figure_2_figure_supplement_3.png]

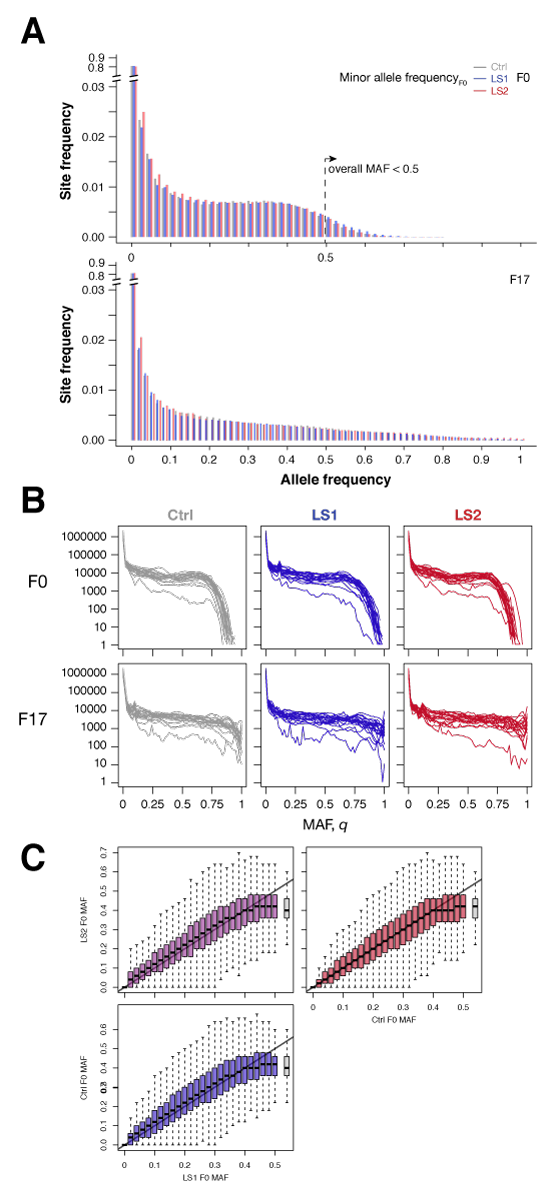

Supplement: supp [file elife-42014-supp-v1.zip › elife_poa_e42014_Figure_2_figure_supplement_1.png]

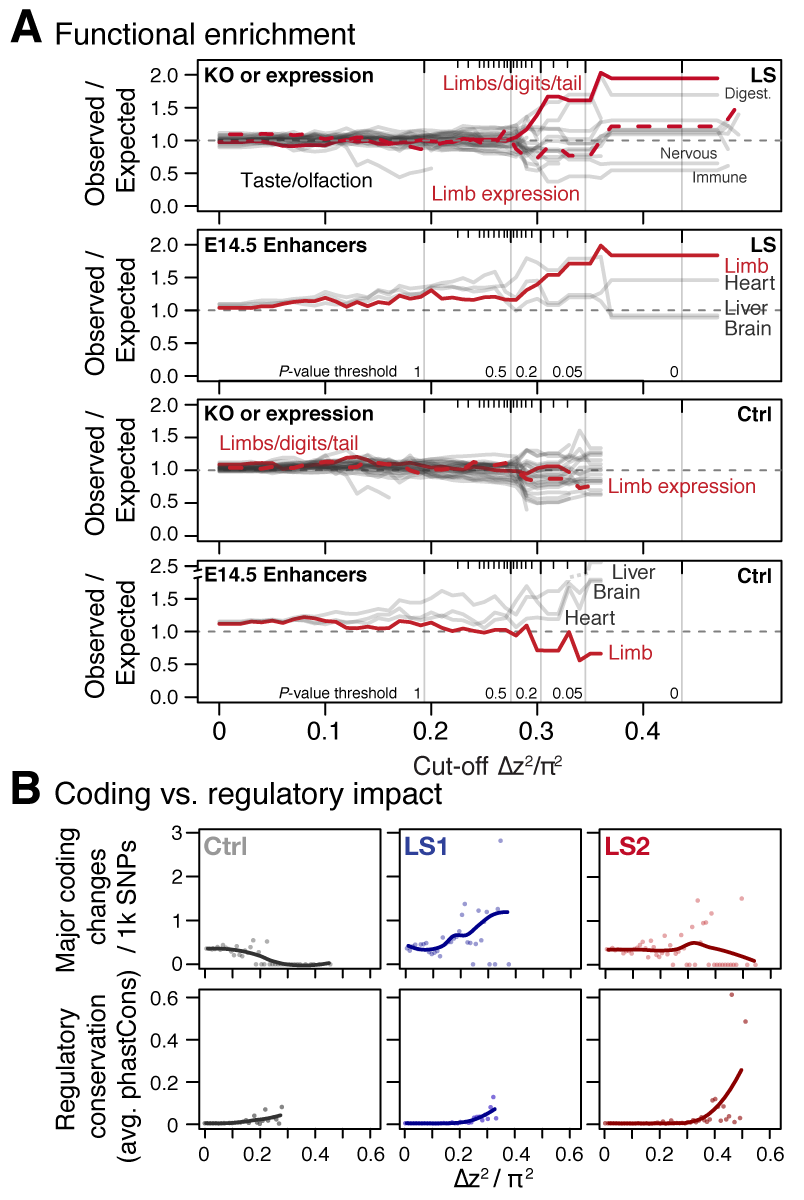

Supplement: supp [file elife-42014-supp-v1.zip › elife_poa_e42014_Figure_3_figure_supplement_1.png]

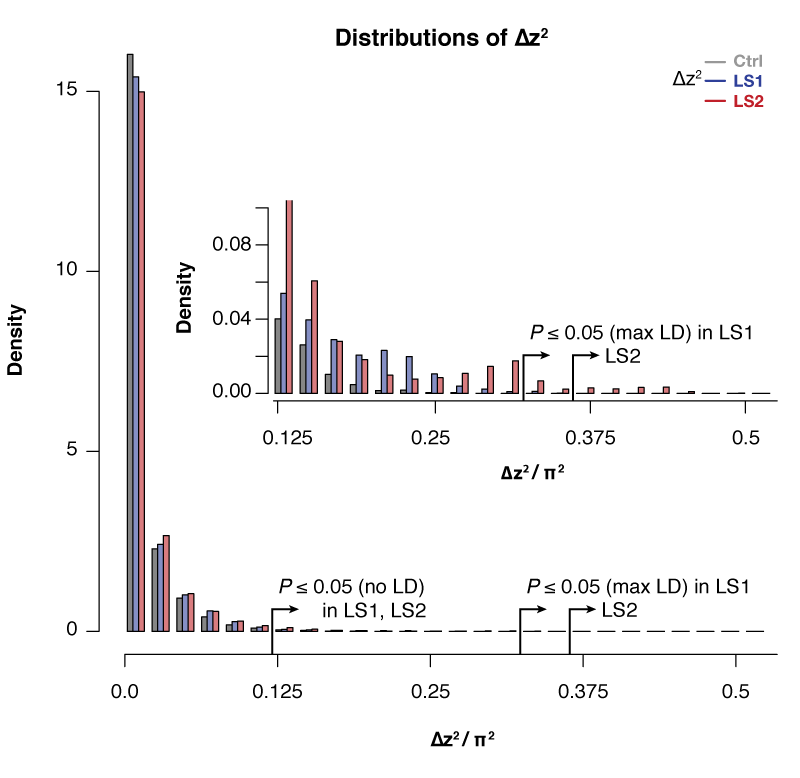

Supplement: supp [file elife-42014-supp-v1.zip › elife_poa_e42014_Figure_2_figure_supplement_2.png]

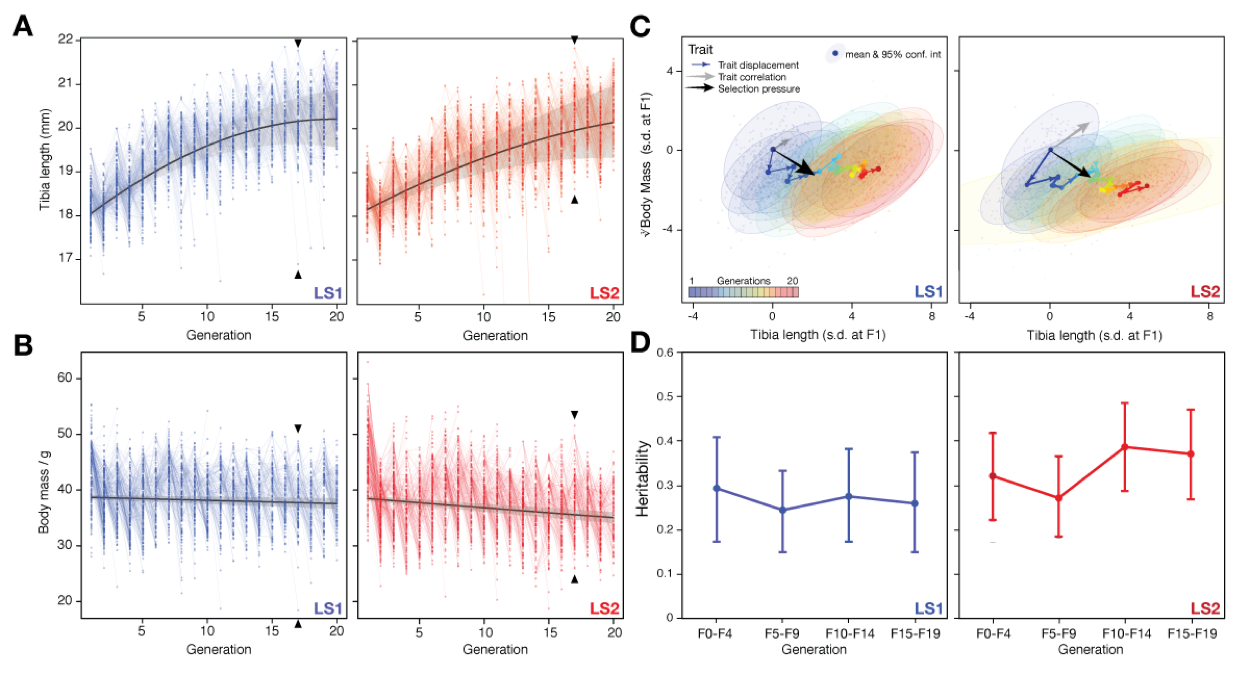

Supplement: supp [file elife-42014-supp-v1.zip › elife_poa_e42014_Figure_1_figure_supplement_1.png]

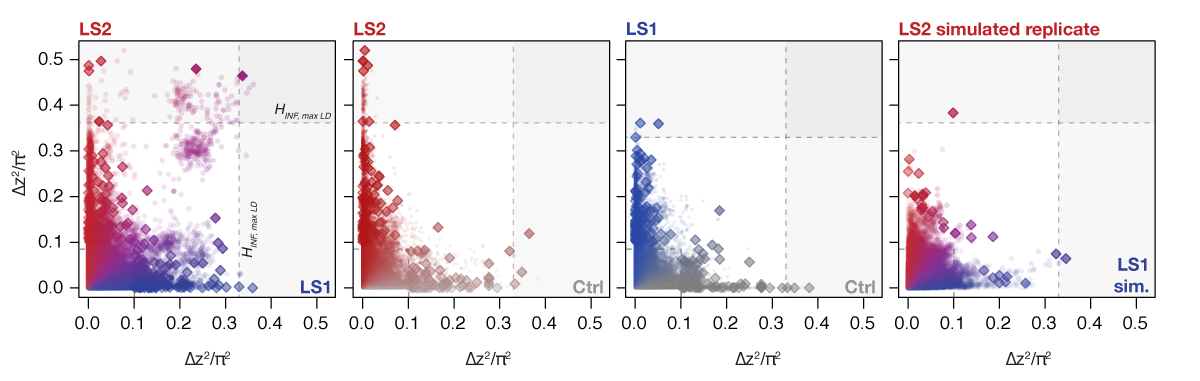

Supplement: supp [file elife-42014-supp-v1.zip › elife_poa_e42014_Figure_3_figure_supplement_2.png]

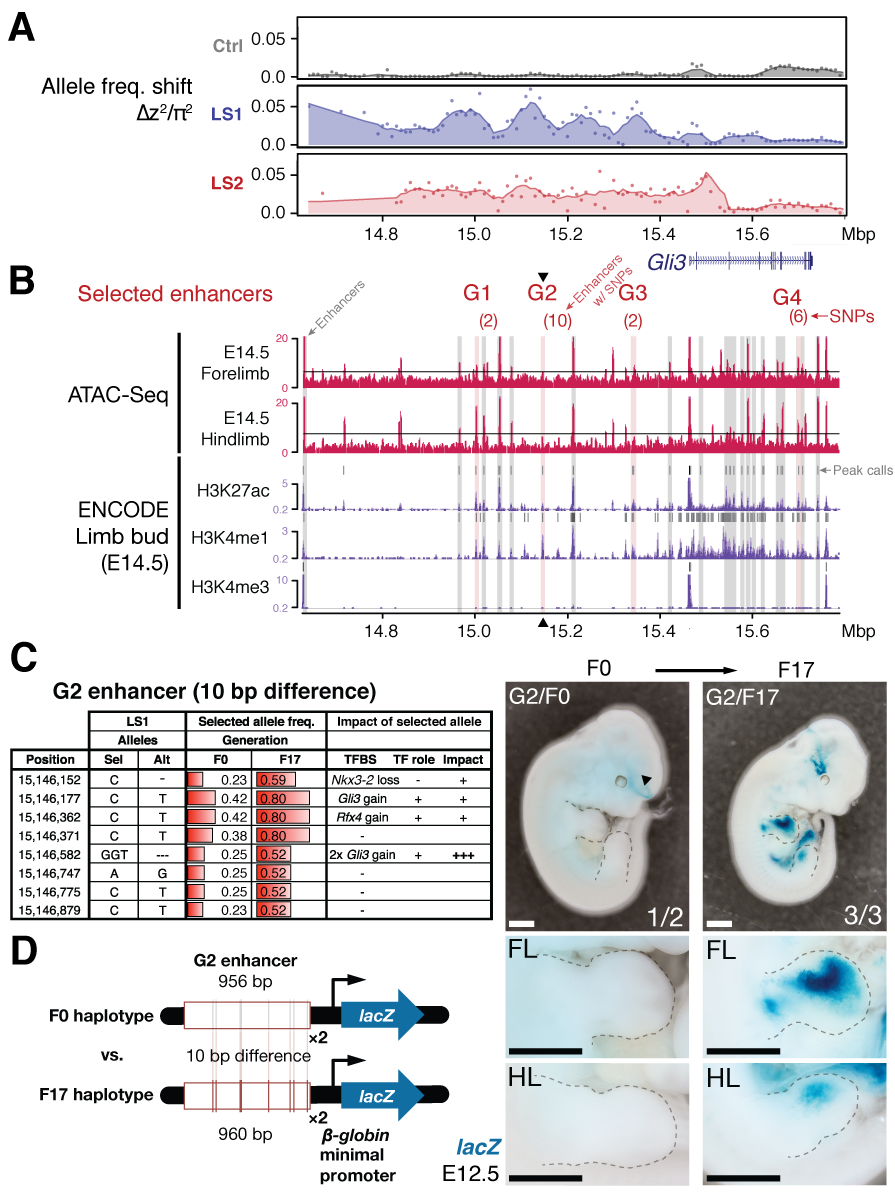

Supplement: supp [file elife-42014-supp-v1.zip › elife_poa_e42014_Figure_4_figure_supplement_1.png]

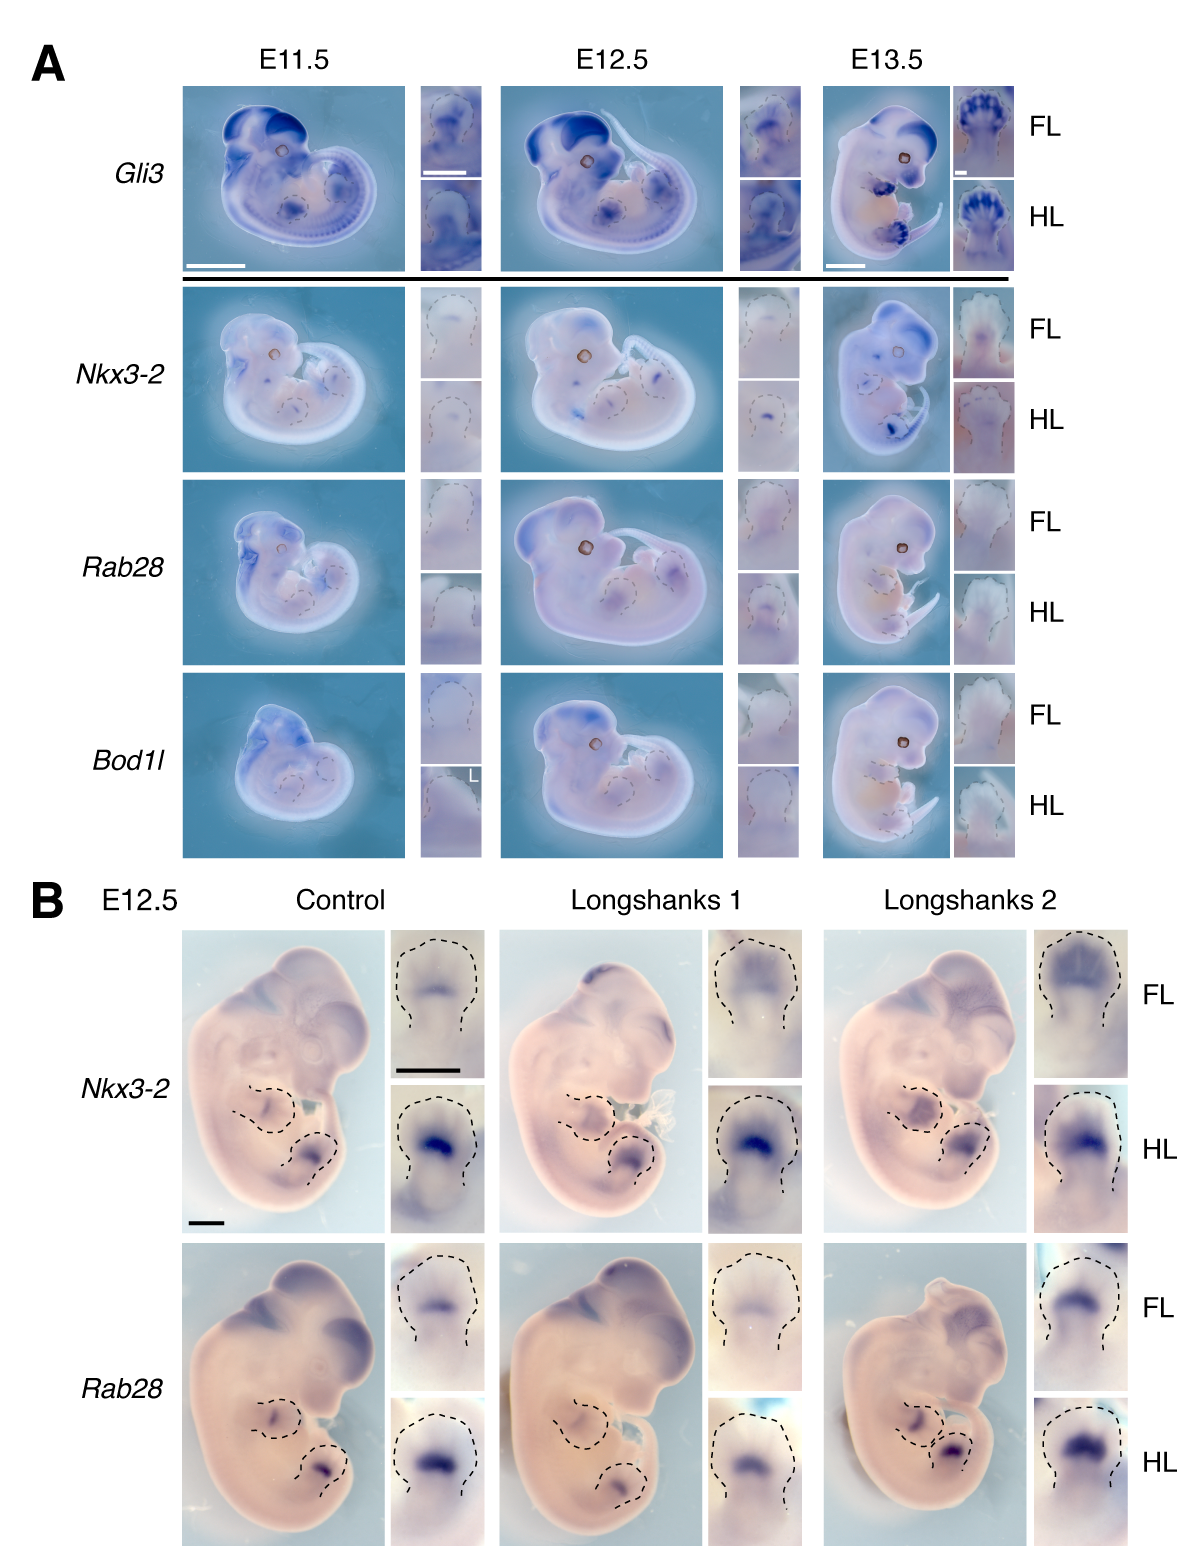

Supplement: supp [file elife-42014-supp-v1.zip › elife_poa_e42014_Figure_4_figure_supplement_2.png]
